# Supplementary material
Source: PubMed Central journal article supplement (PMC4183290)
Supplement: pnas.201408017SI.pdf [file pnas.201408017SI.pdf]

# Supporting Information

Muñoz-Barrera and Monje-Casas 10.1073/pnas.1408017111

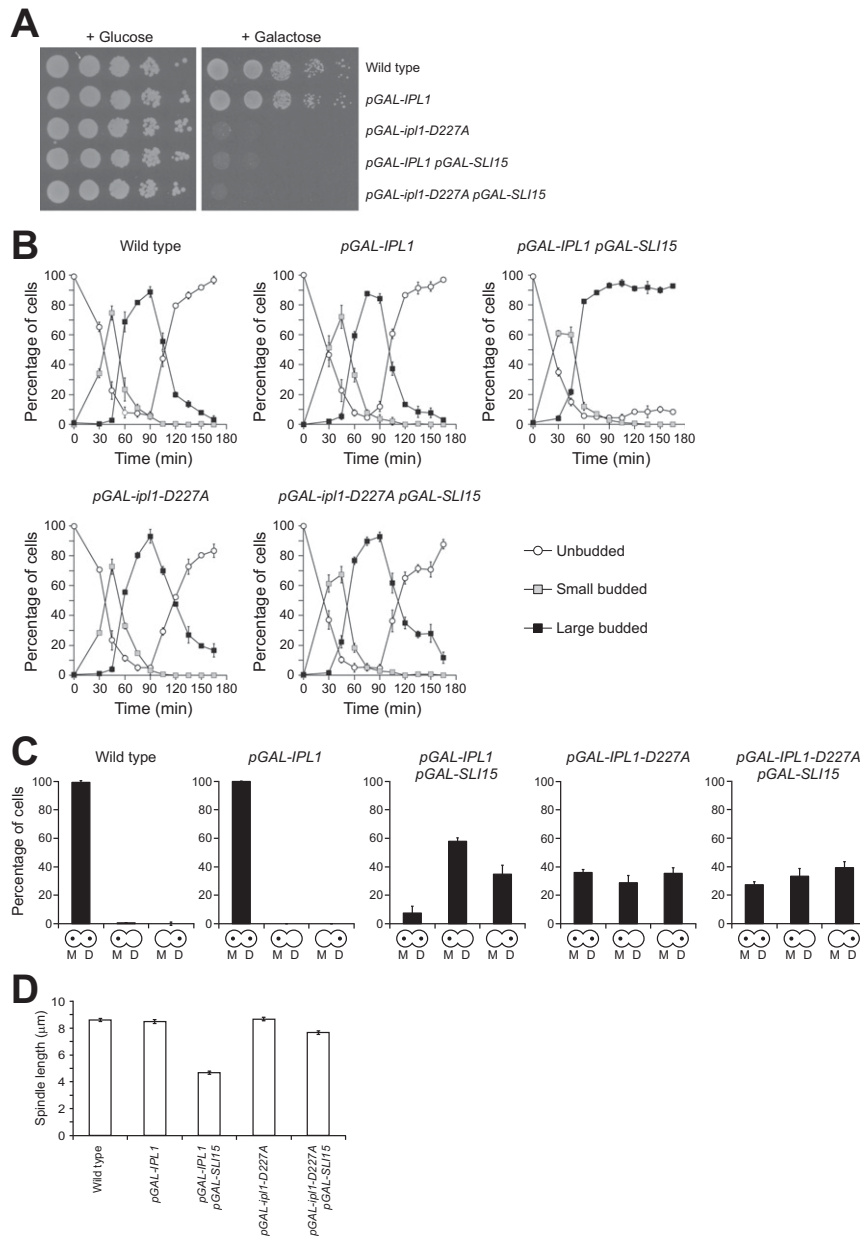

**Fig. S1.** Phenotypes associated with Ipl1 and Sli15 overexpression are dependent on Ipl1 kinase activity. Wild-type (F955), *pGAL-IPL1* (F256), *pGAL-IPL1 pGAL-SLI15* (F947), *pGAL-ipl1-D227A* (F2008), and *pGAL-ipl1-D227A pGAL-SLI15* (F2021) cells were grown at 25 °C in rich medium (yeast extract/peptone) with 2% raffinose (YPR). (A) Cell viability was determined by spotting 10-fold serial dilutions of the previous cultures grown on either yeast extract/peptone/dextrose or rich medium with 2% galactose and 2% raffinose (YPRG) plates, which then were incubated at 25 °C. (B–D) Cells from the cultures grown in YPR medium were arrested in G1 with 5 μg/mL α-factor and were released into fresh YPRG medium. Thirty minutes before the release, 2% galactose was added to induce transcription from *pGAL*. α-Factor was added again 75 min after release to avoid cell-cycle reentry. (B) Percentages of unbudded and small and large budded cells are shown for each time point. Error bars indicate SD ( $n = 3$ ). (C) Analysis of chromosome segregation using CrIV-GFP dots. The graphics below the bars indicate whether sister chromatids segregated correctly [yeast cell with a dot in the mother (M) cell and a dot in the daughter (D) cell] or cosegregated either toward the mother cell (a dot only in the mother cell) or the bud (a dot only in the daughter cell). (D) Average maximum spindle length. Error bars indicate SEM ( $n = 150$ ).

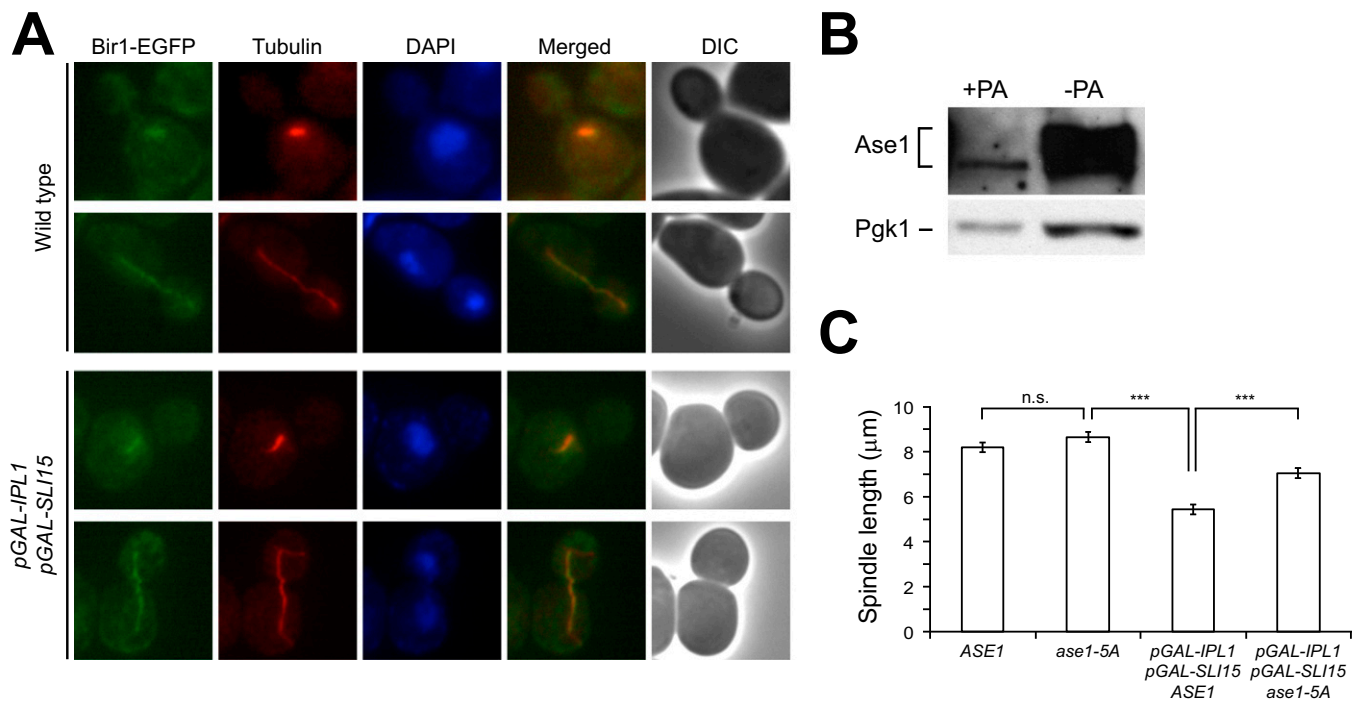

**Fig. S2.** Spindle instability is associated with defective Ase1 function. (A) Wild-type (F1357) and *pGAL-IPL1 pGAL-SLI15* (F1611) cells carrying Bir1-EGFP and Tub1-mCherry fusions were grown at 25 °C in YPR, arrested in G1 with 5 μg/mL α-factor, and released into YPRG. Thirty minutes before the release, 2% galactose was added to induce transcription from *pGAL*. Representative images showing Bir1-EGFP (green), microtubules (red), and DAPI staining (blue) and merged and differential interference contrast (DIC) images are presented. (B) Western blot showing Ase1-EGFP extracted from *pGAL-IPL1 pGAL-SLI15* (F1982) cells before (–PA) and after (+PA) treatment with alkaline phosphatase to demonstrate that the most slowly migrating bands are caused by phosphorylation of the protein. Pgk1 was used as a loading control. (C) Wild-type (F2299), *ase1-5A* (F2289), *pGAL-IPL1 pGAL-SLI15* (F2300), and *pGAL-IPL1 pGAL-SLI15 ase1-5A* (F2288) cells were allowed to enter mitosis synchronously in YPRG as in A. The graph shows average maximum spindle length after the release. Error bars indicate SEM ( $n = 75$ ). Statistically significant ( $***P < 0.0001$ ) and nonsignificant (n.s.) differences according to a two-tailed *t* test are indicated.

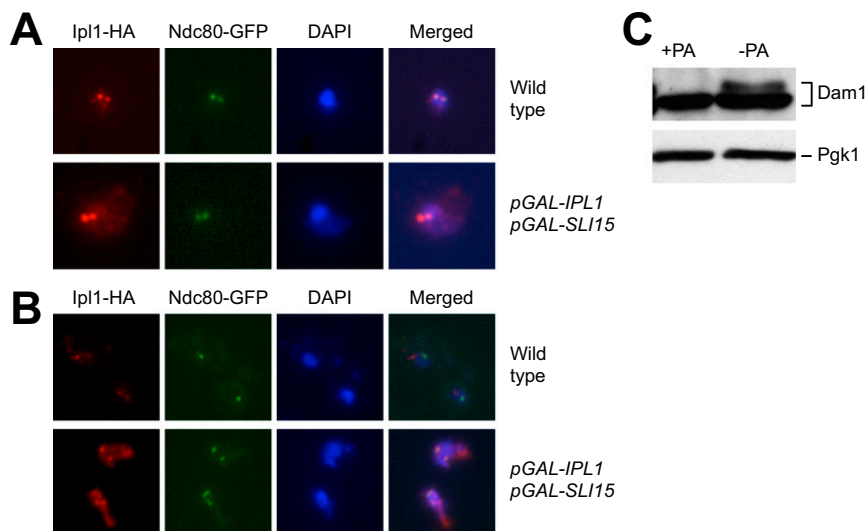

**Fig. S3.** Ipl1 localizes to the centromeres and hyperphosphorylates Dam1 in cells simultaneously overexpressing Ipl1 and Sli15. (A and B) Wild-type (F302) and *pGAL-IPL1 pGAL-SLI15* (F2263) cells carrying HA-tagged Ipl1 fusions and expressing Ndc80-GFP were grown in YPR at 25 °C, were arrested in G1 with 5 μg/mL α-factor, and were released into YPRG. Thirty minutes before the release, 2% galactose was added to induce transcription from *pGAL*. Representative images of chromosome spreads showing Ipl1-HA (red), Ndc80-GFP (green), and DAPI staining (blue) and a merged image are presented for metaphase cells (A) and after chromosome segregation (B). (C) Western blot showing Dam1-3HA extracted from *pGAL-IPL1 pGAL-SLI15* (F2274) cells before (–PA) and after (+PA) treatment with alkaline phosphatase to demonstrate that the most slowly migrating bands are caused by phosphorylation of the protein. Pgk1 was used as a loading control.

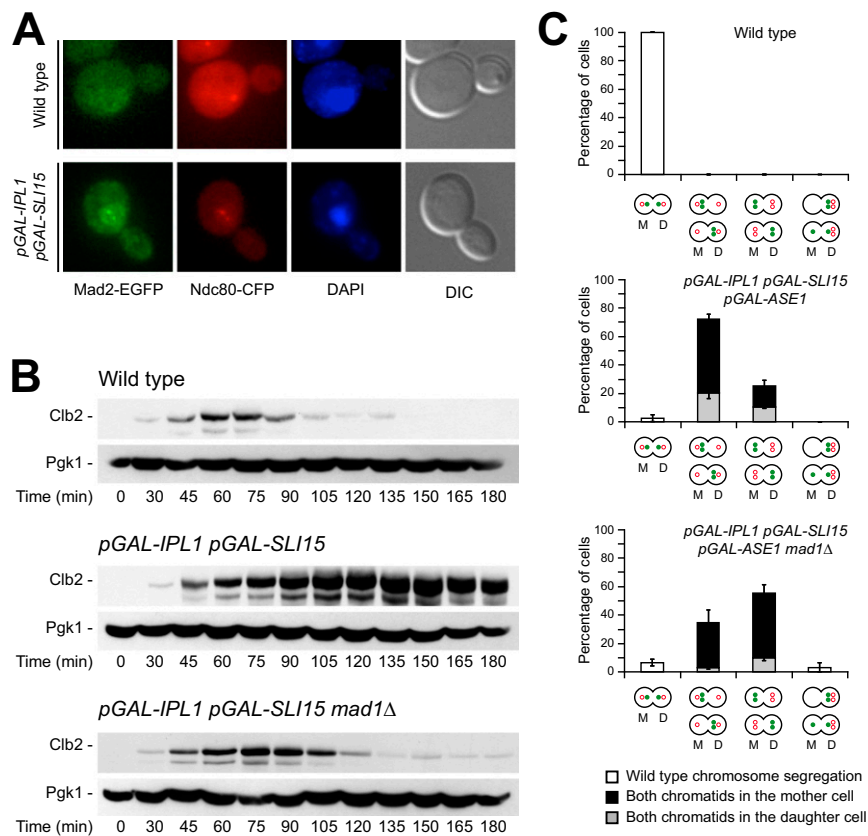

**Fig. S4.** Ipl1 and Sli15 overexpression leads to constitutive activation of the spindle-assembly checkpoint. (A) Wild-type (F217) and *pGAL-IPL1 pGAL-SLI15* (F1963) cells carrying Mad2-EGFP and Ndc80-CFP fusions were grown in YPR at 25 °C, were arrested in G1 with 5 µg/mL  $\alpha$ -factor, and were released into YPRG medium. Thirty minutes before the release, 2% galactose was added to induce transcription from *pGAL*.  $\alpha$ -Factor was added again 75 min after release to avoid cell-cycle reentry. Representative images showing Mad2-EGFP (green), Ndc80-CFP (red), and DAPI staining (blue) and DIC images are presented. (B) Wild-type (F144), *pGAL-IPL1 pGAL-SLI15* (F980), and *pGAL-IPL1 pGAL-SLI15 mad1Δ* (F1376) cells also expressing Pds1-3HA were allowed to enter mitosis synchronously in YPRG as in A. The Western blots show the levels of Clb2 at the indicated time points. Pgk1 was used as a loading control. (C) Analysis of chromosome and spindle-pole body (SPB) segregation in wild-type (F1483), *pGAL-IPL1 pGAL-SLI15 pGAL-ASE1* (F1908), and *pGAL-IPL1 pGAL-SLI15 pGAL-ASE1 mad1Δ* (F1910) cells carrying CrIV-GFP and a Spc42-mCherry fusion. Cells were allowed to enter mitosis synchronously in YPRG as in A. The graphics below the bars indicate the different patterns of CrIV (green closed circle) and SPB (red open circle) segregation included in each category. White bars indicate wild-type chromosome segregation. Cosegregation of sister chromatids is represented by black bars [both sisters in the mother (M) cell] or gray bars [both sisters in the daughter (D) cell].

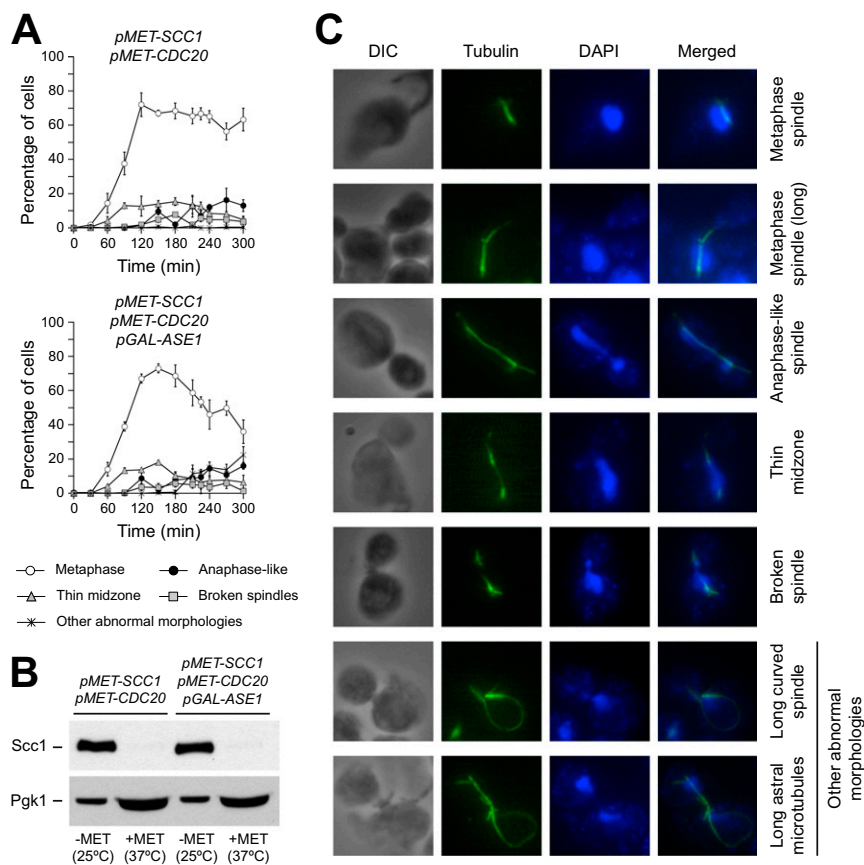

**Fig. S5.** *Ase1* overexpression does not recover spindle instability in metaphase-arrested cells depleted of cohesin. *pMET3-SCC1-18Myc pMET3-CDC20* (F2290) and *pMET3-SCC1-18Myc pMET3-CDC20 pGAL-ASE1* (F2291) cells were grown at 25 °C in synthetic complete (SC) medium with 2% raffinose and without methionine (–MET), were arrested in G1 with 5 μg/mL α-factor, and were released into SC with 2% raffinose and 8 mM methionine (+MET) at 37 °C. Thirty minutes before the release, 8 mM methionine was added to repress transcription from *pMET3*, and cells were transferred at the restrictive temperature. Methionine was added each hour after the release to ensure an efficient transcriptional repression. Once cells reached metaphase, 2% galactose was added to the medium to induce expression from the *pGAL* promoter. (A) Cell-cycle progression was analyzed by spindle (tubulin) and nuclear (DAPI) morphology. Percentages of metaphase and anaphase cells and of cells carrying spindles with a thin midzone, broken spindles, or spindles with other abnormal morphologies (see C for examples) are shown for each time point. Error bars indicate SD ( $n = 3$ ). (B) Western blot showing Scc1-18myc levels before release from α-factor (–MET, 25 °C) and at the final time point (+MET, 37 °C) to demonstrate efficient cohesin depletion. Pgk1 was used as a loading control. (C) Representative images of cells from the different categories established in A. Tubulin (green), DAPI staining (blue), and a merged and a DIC image are shown in each case.

**Table S1. Strains used in this study**

| Strain | Relevant genotype                                                                                                                                                            |
|--------|------------------------------------------------------------------------------------------------------------------------------------------------------------------------------|
| F496   | MATa wild type                                                                                                                                                               |
| F955   | MATa, pURA3::tetR::GFP::LEU2, cenIV::tetOx448::URA3                                                                                                                          |
| F256   | MATa, pURA3::tetR::GFP::LEU2, cenIV::tetOx448::URA3, trp1::pGAL-IPL1::TRP1                                                                                                   |
| F953   | MATa, pURA3::tetR::GFP::LEU2, cenIV::tetOx448::URA3, ura3::pGAL1-10-SLI15::URA3                                                                                              |
| F1640  | MATa, pURA3::tetR::GFP::LEU2, cenIV::tetOx448::URA3, his3::pGAL-BIR1::HIS3                                                                                                   |
| F947   | MATa, pURA3::tetR::GFP::LEU2, cenIV::tetOx448::URA3, trp1::pGAL-IPL1::TRP1, ura3::pGAL1-10-SLI15::URA3                                                                       |
| F1642  | MATa, pURA3::tetR::GFP::LEU2, cenIV::tetOx448::URA3, ura3::pGAL1-10-SLI15::URA3, his3::pGAL-BIR1::HIS3                                                                       |
| F1644  | MATa, pURA3::tetR::GFP::LEU2, CenIV::tetOx448::URA3, trp1::pGAL-IPL1::TRP1, his3::pGAL-BIR1::HIS3                                                                            |
| F1646  | MATa, pURA3::tetR::GFP::LEU2, CenIV::tetOx448::URA3, trp1::pGAL-IPL1::TRP1, ura3::pGAL1-10-SLI15::URA3, his3::pGAL-BIR1::HIS3                                                |
| F144   | MATa, pURA3::tetR::GFP::LEU2, cenIV::tetOx448::URA3, pds1::PDS1-3HA::HIS3MX6                                                                                                 |
| F980   | MATa, pURA3::tetR::GFP::LEU2, cenIV::tetOx448::URA3, pds1::PDS1-3HA::HIS3MX6, trp1::pGAL-IPL1::TRP1, ura3::pGAL1-10-SLI15::URA3                                              |
| F1191  | MATa, pURA3::tetR::GFP::LEU2, cenIV::tetOx448::URA3, pds1::PDS1-3HA::HIS3MX6, trp1::pGAL-IPL1::TRP1                                                                          |
| F1196  | MATa, pURA3::tetR::GFP::LEU2, cenIV::tetOx448::URA3, pds1::PDS1-3HA::HIS3MX6, ura3::pGAL1-10-SLI15::URA3                                                                     |
| F1376  | MATa, pURA3::tetR::GFP::LEU2, cenIV::tetOx448::URA3, pds1::PDS1-3HA::HIS3MX6, trp1::pGAL-IPL1::TRP1, ura3::pGAL1-10-SLI15::URA3, mad1::HIS3MX6                               |
| F1912  | MATa, pURA3::tetR::GFP::LEU2, cenIV::tetOx448::URA3, pds1::PDS1-3HA::HIS3MX6, trp1::pGAL-IPL1::TRP1, ura3::pGAL1-10-SLI15::URA3, his3::pGAL-ASE1::HIS3                       |
| F1735  | MATa, pURA3::tetR::GFP::LEU2, CenIV::tetOx448::URA3, trp1::pGAL-IPL1::TRP1, ura3::pGAL1-10-SLI15::URA3, his3::pGAL-ASE1::HIS3                                                |
| F1753  | MATa, his3::pIPL1-IPL1::HIS3                                                                                                                                                 |
| F1754  | MATa, trp1::pSLI15-SLI15::TRP1                                                                                                                                               |
| F2019  | MATa, his3::pIPL1-IPL1::HIS3, trp1::pSLI15-SLI15::TRP1                                                                                                                       |
| F2008  | MATa, pURA3::tetR::GFP::LEU2, cenIV::tetOx448::URA3, trp1::pGAL-ipl1-D227A::TRP1                                                                                             |
| F2021  | MATa, pURA3::tetR::GFP::LEU2, cenIV::tetOx448::URA3, trp1::pGAL-ipl1-D227A::TRP1, ura3::pGAL1-10-SLI15::URA3                                                                 |
| F1670  | MATa, pURA3::tetR::GFP::LEU2, CenIV::tetOx448::URA3, pMET-CDC20::URA3                                                                                                        |
| F1948  | MATa, pURA3::tetR::GFP::LEU2, CenIV::tetOx448::URA3, pMET-CDC20::URA3, trp1::pGAL-IPL1::TRP1, ura3::pGAL1-10-SLI15::URA3                                                     |
| F1483  | MATa, spc42::SPC42-mCherry::KanMX6, pURA3::tetR::GFP::LEU2, cenIV::tetOx448::URA3                                                                                            |
| F1417  | MATa, trp1::pGAL-IPL1::TRP1, ura3::pGAL1-10-SLI15::URA3, pURA3::tetR::GFP::LEU2, cenIV::tetOx448::URA3, spc42::SPC42-mCherry::KanMX6                                         |
| F1927  | MATa, pURA3::tetR::GFP::LEU2, CenIV::tetOx448::URA3, trp1::pGAL-IPL1::TRP1, ura3::pGAL1-10-SLI15::URA3, mad1::HIS3MX6, spc42::SPC42-mCherry::KanMX6                          |
| F1562  | MATa, trp1::pGAL-IPL1::TRP1, ura3::pGAL1-10-SLI15::URA3, pURA3::tetR::GFP::LEU2, cenIV::tetOx448::URA3, spc42::SPC42-mCherry::KanMX6, nup159::NUP159-GFP-TRP1                |
| F1811  | MATa, trp1::pGAL-IPL1::TRP1, ura3::pGAL1-10-SLI15::URA3, mad1::HIS3MX6, pURA3::tetR::GFP::LEU2, cenIV::tetOx448::URA3, spc42::SPC42-mCherry::KanMX6, nup159::NUP159-GFP-TRP1 |
| F1845  | MATa, pURA3::tetR::GFP::LEU2, CenIV::tetOx448::URA3, trp1::pGAL-IPL1::TRP1, ura3::pGAL1-10-SLI15::URA3, mad1::HIS3MX6                                                        |
| F1700  | MATa, pURA3::tetR::GFP::LEU2, CenIV::tetOx448::URA3, trp1::pGAL-IPL1::TRP1, ura3::pGAL1-10-SLI15::URA3, ahc1::His3MX6                                                        |
| F1908  | MATa, pURA3::tetR::GFP::LEU2, CenIV::tetOx448::URA3, trp1::pGAL-IPL1::TRP1, ura3::pGAL1-10-SLI15::URA3, his3::pGAL-ASE1::HIS3, spc42::SPC42-mCherry::KanMX6                  |
| F1910  | MATa, pURA3::tetR::GFP::LEU2, CenIV::tetOx448::URA3, trp1::pGAL-IPL1::TRP1, ura3::pGAL1-10-SLI15::URA3, his3::pGAL-ASE1::HIS3, mad1::HIS3MX6, spc42::SPC42-mCherry::KanMX6   |
| F2273  | MATa, DAM1-3HA::HIS3MX6                                                                                                                                                      |
| F2274  | MATa, trp1::pGAL-IPL1::TRP1, ura3::pGAL1-10-SLI15::URA3, DAM1-3HA::HIS3MX6                                                                                                   |
| F217   | MATa, NDC80-CFP::TRP1, mad2::MAD2-yEGFP-HIS                                                                                                                                  |
| F1963  | MATa, NDC80-CFP::TRP1, trp1::pGAL-IPL1::TRP1, ura3::pGAL-SLI15::URA3, mad2::MAD2-yEGFP-HIS                                                                                   |
| F302   | MATa, NDC80-GFP::URA3, IPL1-6HA::HIS3MX6                                                                                                                                     |
| F2263  | MATa, NDC80-GFP::URA3, IPL1-6HA::HIS3MX6, trp1::pGAL-IPL1-3HA::TRP1, ura3::pGAL1-10-SLI15::URA3                                                                              |
| F1357  | MATa, ura3::pRS306-mCherry-TUB1::URA3, BIR1-yEGFP::SpHIS5                                                                                                                    |
| F1611  | MATa, CenIV::tetOx448::URA3, trp1::pGAL-IPL1::TRP1, his3::pGAL1-10-SLI15::HIS3, ura3::pRS306-mCherry-TUB1::URA3, BIR1-yEGFP::SpHIS5                                          |
| F1951  | MATa, ura3::pRS306-mCherry-TUB1::URA3, ASE1-yEGFP::SpHIS5                                                                                                                    |
| F1982  | MATa, trp1::pGAL-IPL1::TRP1, his3::pGAL1-10-SLI15::HIS3, ura3::pRS306-mCherry-TUB1::URA3, ASE1-yEGFP::SpHIS5                                                                 |
| F2299  | MATa, ase1::KanMX, pSB152::ASE1::LEU2 (CEN plasmid)                                                                                                                          |
| F2289  | MATa, ase1::KanMX, pSB962::ase1-5A::LEU2 (CEN plasmid)                                                                                                                       |
| F2300  | MATa, trp1::pGAL-IPL1::TRP1, ura3::pGAL1-10-SLI15::URA3, ase1::KanMX, pSB152::ASE1::LEU2 (CEN plasmid)                                                                       |
| F2288  | MATa, trp1::pGAL-IPL1::TRP1, ura3::pGAL1-10-SLI15::URA3, ase1::KanMX, pSB962::ase1-5A::LEU2 (CEN plasmid)                                                                    |
| F2290  | MATa, scc1::pMET3-SCC1-18Myc::TRP1, cdc20::pMET3-CDC20::URA3                                                                                                                 |
| F2291  | MATa, scc1::pMET3-SCC1-18Myc::TRP1, cdc20::pMET3-CDC20::URA3, his3::pGAL-ASE1::HIS3                                                                                          |
| F1570  | MATa, ura3::pAFS125-TUB1-GFP::URA3                                                                                                                                           |
| F1803  | MATa, trp1::pGAL-IPL1::TRP1, his3::pGAL1-10-SLI15::HIS3, ura3::pAFS125-TUB1-GFP::URA3                                                                                        |

All strains are W303 derivatives. Only relevant differences in the genotype with respect to the wild-type strain (F496) are shown in each case.

**Table S2. Antibodies for Western blot**

| Protein    | Primary antibody                                             | Primary antibody dilution | Secondary antibody                     | Secondary antibody dilution |
|------------|--------------------------------------------------------------|---------------------------|----------------------------------------|-----------------------------|
| Pds1-3HA   | Monoclonal HA.11 (Covance)                                   | 1:5,000                   | Anti-mouse HRP-linked (GE Healthcare)  | 1:10,000                    |
| Pgk1       | Monoclonal anti-Pgk1 (Invitrogen)                            | 1:20,000                  | Anti-mouse HRP-linked (GE Healthcare)  | 1:10,000                    |
| Clb2       | Polyclonal anti-Clb2<br>(Santa Cruz Biotechnology)           | 1:2,000                   | Anti-rabbit HRP-linked (GE Healthcare) | 1:10,000                    |
| H3         | Polyclonal anti-histone H3 (Abcam)                           | 1:500                     | Anti-rabbit HRP-linked (GE Healthcare) | 1:2,000                     |
| H3S10P     | Polyclonal anti-H3S10P<br>(Santa Cruz Biotechnology.)        | 1:500                     | Anti-rabbit HRP-linked (GE Healthcare) | 1:2,000                     |
| Ase1-EGFP  | JL-8 Living colors monoclonal<br>antibody (Takara Bio, Inc.) | 1:1,000                   | Anti-mouse HRP-linked (GE Healthcare)  | 1:2,000                     |
| Dam1-3HA   | Monoclonal HA.11 (Covance)                                   | 1:500                     | Anti-mouse HRP-linked (GE Healthcare)  | 1:1,000                     |
| Scc1-18Myc | Monoclonal 9E10 (Covance)                                    | 1:5,000                   | Anti-mouse HRP-linked (GE Healthcare)  | 1:10,000                    |

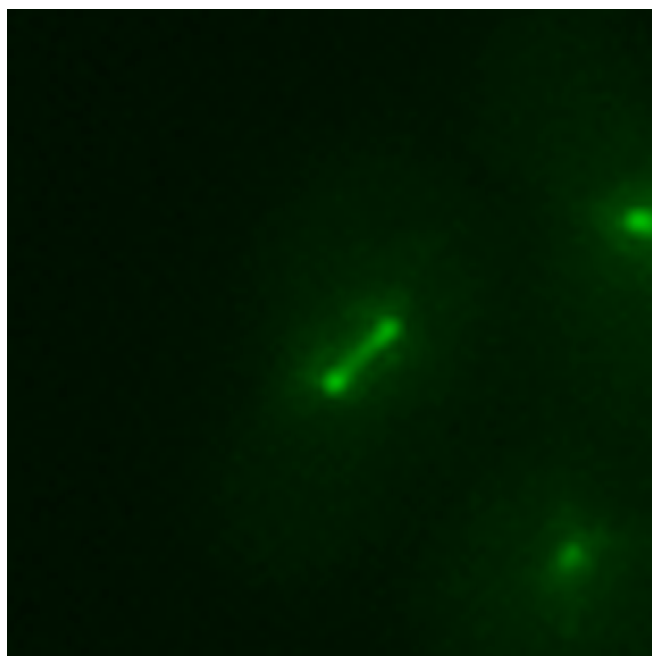

**Movie S1.** Spindle elongation in wild-type cells. Spindle elongation in a wild-type cell (F1570) carrying a Tub1-GFP fusion and growing in YPRG medium, as determined by time-lapse microscopy. Each time point was taken 2 min after the previous one and represents the maximum projection of a series of seven 0.78- $\mu\text{m}$ -spaced z sections.

[Movie S1](#)

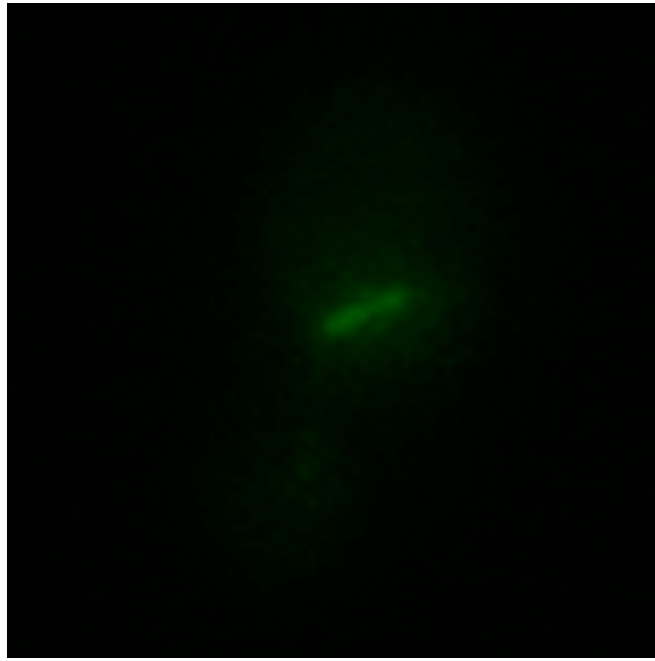

**Movie S2.** Spindle elongation in cells overexpressing Ipl1 and Sli15. Spindle elongation in a *pGAL-IPL1 pGAL-SLI15* cell (F1803) carrying a Tub1-GFP fusion and growing in YPRG medium, as determined by time-lapse microscopy. Each time point was taken 2 min after the previous one and represents the maximum projection of a series of seven 0.78- $\mu\text{m}$ -spaced z sections.

[Movie S2](#)
